# Supplementary material for: Electronic case report forms generation from pathology reports by ARGO, automatic record generator for onco-hematology
Source: PubMed Central journal article supplement (PMC8664934; doi:10.1038/s41598-021-03204-z), 2021-12-10
Supplement: 41598_2021_3204_MOESM1_ESM.pdf [file 41598_2021_3204_MOESM1_ESM.pdf]

# Electronic Case Report Forms generation from pathology reports by ARGO, Automatic Record Generator for Onco-hematology.

## SUPPLEMENTARY APPENDIX

- **Figure S1.** Figure 1B from main manuscript in high resolution format.
- **Figure S2.** Logical description of the NLP rules implemented in ARGO.
- **Table S1.** Performance metric from n. 239 internal and n. 93 external pathology reports.
- **Table S2.** Referred thesaurus for biomarkers recognition and for the diagnosis definition.
- **Table S3.** Set of NLP regular expressions embedded into the *header\_function.py*.
- **Table S4.** Set of NLP rules embedded into the *function\_read.py* for the whole patterns identified according to each scenario.
- **Table S5.** Data dictionary extracted from REDCap for data fields used to map each word detected from the NLP.
- **Source code S1.** Source code developed in Python for the application of the thesaurus rules.
- **References**

*This supplementary material has been provided by the authors to give readers additional information about their work.*

Figure S1. Figure 1B from main manuscript in high resolution format.

| Data Collection Instrument | Diagnosis                           |
|----------------------------|-------------------------------------|
| Demographic                | <input checked="" type="radio"/>    |
| Medical history            | <input type="radio"/>               |
| Biological parameters      | <input type="radio"/>               |
| Disease parameters         | <input checked="" type="radio"/>    |
| Patient parameters         | <input type="radio"/>               |
| 1st line of therapy        |                                     |
| Clinical response          |                                     |
| Previous follow-up         |                                     |
| Subsequent lines           |                                     |
| Last contact               |                                     |
| Delete all data on event:  | <input checked="" type="checkbox"/> |

  

**Histopathological examination**

**Has the histopathological examination been executed ?**  
 Yes  
 No  
\* must provide value reset

---

**Diagnosis**

**Date of diagnosis**  
\* must provide value   D-M-Y

**Diagnosis (semi-automatic)**  
\* must provide value

**T-cell rich**  
 Yes

---

**Nodal vs extra-nodal examination (excluding bone marrow)**

**Was the specimen type a lymph-node ?**  
\* must provide value  
 Yes, the specimen is nodal  
 No, the specimen is extra-nodal  
 No, the specimen is from the peripheral blood  
 No, the specimen type is not specified reset

Bone  
 Peripheral blood  
 Eye attachments  
 CNS  
 Meninges  
 Paranasal sinus  
 Nasal sinus  
 Waldeyer's ring  
 Salivary glands  
 Airborne  
 Lung  
 Skin  
 Thyroids  
 Breast  
 Liver  
 Stomach  
 Duodenum  
 Jejunum  
 Ileum  
 Colon  
 Pancreas  
 Urinary tract  
 Testiculus  
 Spleen  
 Kidney left  
 Kidney right  
 Others

**if not, please define whether extra-nodal site or peripheral blood (bone marrow excluded)**  
\* must provide value

**Was the exam performed internally to the institution ?**  
 Yes  
 No  
 Not Available reset

**Number of the exam**  
\* must provide value

**Date of the exam**  
\* must provide value   D-M-Y

Representative picture of REDCap dashboard for a single case report including “Demography” and “Disease parameters” forms (red bullets).

**Figure S2. Logical description of the NLP rules implemented in ARGO.**

| <i>header_info.py</i>   |                                                                                                                                                                                                                                                                                                                                                                                                                                             |
|-------------------------|---------------------------------------------------------------------------------------------------------------------------------------------------------------------------------------------------------------------------------------------------------------------------------------------------------------------------------------------------------------------------------------------------------------------------------------------|
| A                       | 1) ARGO recognized the hospital template in the header section (NLP regular expression reported in Supplementary Table S1). Thus,                                                                                                                                                                                                                                                                                                           |
|                         | 1.1) ARGO sought words related to the reported date to initialize the <i>BIOPSY DATE</i> data-field.                                                                                                                                                                                                                                                                                                                                        |
|                         | 1.2) ARGO sought words related to the report ID date to initialize the <i>the ID NUMBER</i> data-field                                                                                                                                                                                                                                                                                                                                      |
|                         | 1.3) ARGO sought the words related to the patient’s identification (e.g. “Cognome”, “Nome”):                                                                                                                                                                                                                                                                                                                                                |
|                         | - <i>NAME, SURNAME, DATE OF BIRTH, PLACE OF BIRTH data fields</i>                                                                                                                                                                                                                                                                                                                                                                           |
|                         | - <i>SSN,</i>                                                                                                                                                                                                                                                                                                                                                                                                                               |
|                         | i. in case the SSN code was present, ARGO initialized the SSN code data-field,                                                                                                                                                                                                                                                                                                                                                              |
|                         | ii. In case the SSN code was not present, ARGO automatically calculated the SSN code via external webservice from <i>NAME, SURNAME, DATE OF BIRTH, PLACE OF BIRTH</i> data-fields.                                                                                                                                                                                                                                                          |
|                         | 1.4) ARGO sought the words related to the specimen material at identifying the <i>SPECIMEN TYPE</i> data-field                                                                                                                                                                                                                                                                                                                              |
| <i>function_read.py</i> |                                                                                                                                                                                                                                                                                                                                                                                                                                             |
| A.                      | IHC MARKERS. For each marker recognized in the text (Supplementary Table S2)                                                                                                                                                                                                                                                                                                                                                                |
|                         | i. ARGO prompted the biomarker to the SEER database via API key (via <i>params.py</i> ),                                                                                                                                                                                                                                                                                                                                                    |
|                         | ii. The SEER database responded providing the relative biomarker,                                                                                                                                                                                                                                                                                                                                                                           |
|                         | iii. if either points i) or ii) failed, ARGO internally prompted the biomarker to the “in-house” thesaurus (Supplementary Table S1);                                                                                                                                                                                                                                                                                                        |
|                         | iv. If also the point iii) failed, the relative data field from eCRF was not initialized.                                                                                                                                                                                                                                                                                                                                                   |
| B.                      | IHC MARKERS (POSITIVITY/NEGATIVITY). A marker was assumed positive if the nearest adjective/noun reported on the left was “positivo/positività” or, if appended to marker is reported a ‘+’ (plus). A marker was assumed negative if the nearest adjective/noun reported on the left is “negativo/negatività” or, if appended to marker was reported a ‘-’ (dash).                                                                          |
| C.                      | IHC MARKERS (QUANTITY). Markers expressed with a quantity in percentage (e.g. Ki-67, MYC, BCL2, BCL6) were identified if the nearest marker on the left was a percentage number, as expected.                                                                                                                                                                                                                                               |
| D.                      | FISH.                                                                                                                                                                                                                                                                                                                                                                                                                                       |
|                         | i. ARGO sought if the FISH exam was added,                                                                                                                                                                                                                                                                                                                                                                                                  |
|                         | ii. ARGO sought FISH markers (MYC, BCL2, BCL6, and CYCLIN D1) and if they were either positive or negative. A marker was assumed positive if the nearest adjective/noun reported on the left was “positivo/positività” or, if appended to marker was reported a ‘+’ (plus). A marker was assumed negative if the nearest adjective/noun reported on the left was “negativo/negatività” or, if appended to marker was reported a ‘-’ (dash). |
| E.                      | CELL OF ORIGIN. ARGO seeks in the report the words “Germinal Center B-like” or “GCB”. The COO is assumed negative if the nearest word reported on the left of the COO is “non” or “no”.                                                                                                                                                                                                                                                     |
| F.                      | DIAGNOSIS.                                                                                                                                                                                                                                                                                                                                                                                                                                  |
|                         | i. ARGO prompted the diagnosis to the SEER database via API key (via <i>params.py</i> ),                                                                                                                                                                                                                                                                                                                                                    |
|                         | ii. The SEER database responded providing the relative biomarker,                                                                                                                                                                                                                                                                                                                                                                           |
|                         | iii. if either points i) or ii) failed, ARGO internally prompted the diagnosis to the “in-house” thesaurus (Supplementary Table S1);                                                                                                                                                                                                                                                                                                        |
|                         | iv. If also the point iii) failed, the relative diagnosis from eCRF was not initialized.                                                                                                                                                                                                                                                                                                                                                    |

B

*header\_info.py*

BIOPSY DATE

REGIONE PUGLIA  
Istituto di Ricovero e Cura a Carattere Scientifico  
ISTITUTO TUMORI GIOVANNI PAOLO II  
70124 BARI - VIA ORAZIO FLACCO 65  
Servizio di Anatomia e Istologia Patologica  
Direttore: Dott. Francesco A. Zito

Data Accettazione: 04/05/2019 N. Esame: 19-I-09325

Cognome : SURNAME (1.3) Nome : NAME  
Data di nascita : DOB (1.3) Comune di Nascita : Place of birth  
Sesso : SEX Codice Fiscale : SSN

Materiale Inviato  
A-Biopsie gastriche (1.4)  
Notizie Cliniche  
EGDS: estesa ulcera gastrica di verosimile natura eterologa.

ID NUMBER

SPECIMEN TYPE

*function\_read.py*

DIAGNOSIS

POSITIVE MARKERS

QUANTITATIVE  
MARKERS

COMUNICAZIONE DI DIAGNOSI ISTOLOGICO

Macroscopica  
5 frustoli.  
mc

Diagnosi  
Infiltrazione gastrica di linfoma non Hodgkin diffuso a grandi cellule B di tipo non "germinal center type" sec. algoritmo di Hans. (F) (E)  
IHC: positività per CD20, BCL2, MUM1. Negatività per BCL6, CD10, CD30 e CD3 (A,B)  
Ki 67 pari al 95% circa (C)

Codice Snomed  
P1-03100 T-57000 M-95913

NEGATIVE MARKERS

pag. 1 di 1

Refertato 16/05/2019

N. Esame 19-I-09325

A) The pseudocode describes all logical phases executed by ARGO in recognizing each data field from the header and disease section of a paper-based report. B) Application of each NLP phase on an example of paper-based report from the internal series (Pathology Unit of the IRCCS Istituto Tumori “Giovanni Paolo II” of Bari, Italy).

**Abbreviations.** ARGO: Automatic Record Generator for Onco-hematology, NLP: Natural Language Processing, ID: Identification, SSN: security social number, SEER: Surveillance, Epidemiology, and End Result API: Application Programming Interface, IHC: Immunohistochemistry, FISH: Fluorescent in situ hybridization, COO: cell of origin, GCB: Germinal Center B-like.

**Table S1. Performance metric from n. 239 internal and n. 93 external pathology reports.**

| DATA FIELD            | INTERNAL SERIES |           |        |          | EXTERNAL SERIES |           |        |          | p      |
|-----------------------|-----------------|-----------|--------|----------|-----------------|-----------|--------|----------|--------|
|                       | Accuracy        | Precision | Recall | F1-score | Accuracy        | Precision | Recall | F1-score |        |
| <b>DIAGNOSIS</b>      | 87.9            | 100.0     | 87.9   | 93.5     | 88.2            | 100.0     | 88.2   | 93.7     | 1.000  |
| <b>BIOPSY DATE</b>    | 97.1            | 100.0     | 97.1   | 98.5     | 94.6            | 100.0     | 90.6   | 95.0     | 0.8833 |
| <b>ID NUMBER</b>      | 92.1            | 100.0     | 92.1   | 95.9     | 83.9            | 100.0     | 77.3   | 87.2     | 0.2134 |
| <b>SPECIMEN TYPE</b>  | 86.6            | 98.5      | 87.2   | 92.5     | 91.4            | 100.0     | 91.4   | 95.5     | 0.9063 |
| <b>IHC EXECUTION</b>  | 95.4            | 100.0     | 95.4   | 97.6     | 97.8            | 100.0     | 97.8   | 98.9     | 0.9868 |
| <b>FISH EXECUTION</b> | 93.7            | 100.0     | 93.7   | 96.8     | 98.9            | 100.0     | 98.9   | 99.5     | 0.8918 |
| <b>BM EXECUTION</b>   | 92.9            | 100.0     | 92.9   | 96.3     | 96.8            | 100.0     | 96.8   | 98.4     | 0.9494 |
| <b>COO</b>            | 96.2            | 97.2      | 81.4   | 88.6     | 94.6            | 100.0     | 84.8   | 91.8     | 0.9491 |
| <b>MYC</b>            | 93.7            | 100.0     | 57.1   | 72.7     | 89.2            | 96.7      | 76.3   | 85.3     | 0.0716 |
| <b>BCL2</b>           | 77.4            | 98.5      | 71.4   | 82.8     | 82.8            | 98.4      | 80.8   | 88.7     | 0.6090 |
| <b>BCL6</b>           | 69.5            | 99.1      | 61.5   | 75.9     | 79.6            | 98.1      | 74.3   | 84.6     | 0.2231 |

|                  |      |       |      |      |      |       |      |      |        |
|------------------|------|-------|------|------|------|-------|------|------|--------|
| <b>CD10</b>      | 67.4 | 96.9  | 55.9 | 70.9 | 82.8 | 98.5  | 81.0 | 88.9 | 0.0025 |
| <b>CD20</b>      | 78.2 | 99.4  | 76.3 | 86.3 | 91.4 | 100.0 | 90.7 | 95.1 | 0.1715 |
| <b>CYCLIN D1</b> | 90.4 | 100.0 | 71.6 | 83.5 | 86.0 | 100.0 | 69.8 | 82.2 | 0.9622 |
| <b>KI-67</b>     | 85.4 | 99.4  | 81.9 | 89.8 | 80.6 | 100.0 | 76.3 | 86.6 | 0.8469 |

**Abbreviations.** IHC, immunohistochemistry; FISH, fluorescent *in situ* hybridization; BM, bone marrow; CD, cluster of differentiation; COO, cell of origin subtype.

**Table S2. Referenced thesaurus for biomarkers recognition and for the diagnosis definition.**

| DIAGNOSIS <sup>1, 2</sup>                                 | MARKER                       | TYPE              | VARIANTS  |            |            |           |            |            |
|-----------------------------------------------------------|------------------------------|-------------------|-----------|------------|------------|-----------|------------|------------|
| C83.3 DIFFUSE NON-HODGKINS LYMPHOMA, LARGE CELL (DIFFUSE) | BCL2 expression              | Immunophenotyping | BCL-2     | bcl2       | bcl 2      |           |            |            |
| C83.3 DIFFUSE NON-HODGKINS LYMPHOMA, LARGE CELL (DIFFUSE) | MYC expression               | Immunophenotyping | myc       | C-MYC      | c-myc      |           |            |            |
| C83.3 DIFFUSE NON-HODGKINS LYMPHOMA, LARGE CELL (DIFFUSE) | BCL6 positive                | Immunophenotyping | bcl6      | BCL-6      |            |           |            |            |
| C83.3 DIFFUSE NON-HODGKINS LYMPHOMA, LARGE CELL (DIFFUSE) | CD5 expression               | Immunophenotyping | cd5       | cd 5       | CD 5       |           |            |            |
| C83.3 DIFFUSE NON-HODGKINS LYMPHOMA, LARGE CELL (DIFFUSE) | CD10 positive                | Immunophenotyping | cd10      | cd 10      | CD 10      |           |            |            |
| C83.3 DIFFUSE NON-HODGKINS LYMPHOMA, LARGE CELL (DIFFUSE) | CD15 positive                | Immunophenotyping | cd15      | cd 15      | CD 15      |           |            |            |
| C83.3 DIFFUSE NON-HODGKINS LYMPHOMA, LARGE CELL (DIFFUSE) | CD19 expression              | Immunophenotyping | cd19      | cd 19      | CD 19      |           |            |            |
| C83.3 DIFFUSE NON-HODGKINS LYMPHOMA, LARGE CELL (DIFFUSE) | CD20 expression              | Immunophenotyping | cd20      | cd 20      | CD 20      |           |            |            |
| C83.3 DIFFUSE NON-HODGKINS LYMPHOMA, LARGE CELL (DIFFUSE) | CD22 expression              | Immunophenotyping | cd22      | cd 22      | CD 22      |           |            |            |
| C83.3 DIFFUSE NON-HODGKINS LYMPHOMA, LARGE CELL (DIFFUSE) | CD30 expression              | Immunophenotyping | cd30      | cd 30      | CD 30      |           |            |            |
| C83.3 DIFFUSE NON-HODGKINS LYMPHOMA, LARGE CELL (DIFFUSE) | CD79a expression             | Immunophenotyping | cd79a     | cd 79a     | CD 79a     |           |            |            |
| C83.3 DIFFUSE NON-HODGKINS LYMPHOMA, LARGE CELL (DIFFUSE) | FOXP1 expression             | Immunophenotyping | foxp1     |            |            |           |            |            |
| C83.3 DIFFUSE NON-HODGKINS LYMPHOMA, LARGE CELL (DIFFUSE) | IRF4/MUM1 positive           | Immunophenotyping | MUM1/IRF4 | MUM-1/IRF4 | MUM 1/IRF4 | MUM1-IRF4 | MUM-1-IRF4 | MUM 1-IRF4 |
| C83.3 DIFFUSE NON-HODGKINS LYMPHOMA, LARGE CELL (DIFFUSE) | LMO2 expression              | Immunophenotyping | lmo2      | LMO 2      | lmo 2      |           |            |            |
| C83.3 DIFFUSE NON-HODGKINS LYMPHOMA, LARGE CELL (DIFFUSE) | PAX5 expression              | Immunophenotyping | pax5      | PAX 5      | pax 5      |           |            |            |
| C82.9 FOLLICULAR NON-HODGKIN'S LYMPHOMA, UNSPECIFIED      | BCL2 expression and positive | Immunophenotyping | BCL-2     | bcl2       | bcl 2      |           |            |            |

|                                                                    |                               |                   |       |        |        |     |
|--------------------------------------------------------------------|-------------------------------|-------------------|-------|--------|--------|-----|
| C82.9 FOLLICULAR NON-HODGKIN'S LYMPHOMA, UNSPECIFIED               | BCL6 positive                 | Immunophenotyping | bcl6  | BCL-6  |        |     |
| C82.9 FOLLICULAR NON-HODGKIN'S LYMPHOMA, UNSPECIFIED               | CD5 negative                  | Immunophenotyping | cd5   | cd 5   | CD 5   |     |
| C82.9 FOLLICULAR NON-HODGKIN'S LYMPHOMA, UNSPECIFIED               | CD10 expression and positive  | Immunophenotyping | cd10  | cd 10  | CD 10  |     |
| C82.9 FOLLICULAR NON-HODGKIN'S LYMPHOMA, UNSPECIFIED               | CD19 expression               | Immunophenotyping | cd19  | cd 19  | CD 19  |     |
| C82.9 FOLLICULAR NON-HODGKIN'S LYMPHOMA, UNSPECIFIED               | CD20 positive                 | Immunophenotyping | cd20  | cd 20  | CD 20  |     |
| C82.9 FOLLICULAR NON-HODGKIN'S LYMPHOMA, UNSPECIFIED               | CD22 expression               | Immunophenotyping | cd22  | cd 22  | CD 22  |     |
| C82.9 FOLLICULAR NON-HODGKIN'S LYMPHOMA, UNSPECIFIED               | CD23 expression               | Immunophenotyping | cd23  | cd 23  | CD 23  |     |
| C82.9 FOLLICULAR NON-HODGKIN'S LYMPHOMA, UNSPECIFIED               | CD43 negative                 | Immunophenotyping | cd43  | cd 43  | CD 43  |     |
| C82.9 FOLLICULAR NON-HODGKIN'S LYMPHOMA, UNSPECIFIED               | CD79a expression and positive | Immunophenotyping | cd79a | cd 79a | CD 79a |     |
| C82.9 FOLLICULAR NON-HODGKIN'S LYMPHOMA, UNSPECIFIED               | GCET1 positive                | Immunophenotyping | gct1  | CGET 1 | cget 1 |     |
| C82.9 FOLLICULAR NON-HODGKIN'S LYMPHOMA, UNSPECIFIED               | GCET2 (HGAL) positive         | Immunophenotyping | cget2 | CGET 2 | cget 2 |     |
| C82.9 FOLLICULAR NON-HODGKIN'S LYMPHOMA, UNSPECIFIED               | IgD negative                  | Immunophenotyping | igd   | Igd    | IgD    | IGD |
| C82.9 FOLLICULAR NON-HODGKIN'S LYMPHOMA, UNSPECIFIED               | IgM positive                  | Immunophenotyping | igm   | Igm    | IgM    | IGM |
| C82.9 FOLLICULAR NON-HODGKIN'S LYMPHOMA, UNSPECIFIED               | LMO2 positive                 | Immunophenotyping | lmo2  | LMO 2  | lmo 2  |     |
| C82.9 FOLLICULAR NON-HODGKIN'S LYMPHOMA, UNSPECIFIED               | PAX5 positive                 | Immunophenotyping | pax5  | PAX 5  | pax 5  |     |
| C83.1 DIFFUSE NON-HODGKIN'S LYMPHOMA, SMALL CLEAVED CELL (DIFFUSE) | BCL2 positive                 | Immunophenotyping | BCL-2 | bcl2   | bcl 2  |     |
| C83.1 DIFFUSE NON-HODGKIN'S LYMPHOMA, SMALL CLEAVED CELL (DIFFUSE) | BCL6 negative                 | Immunophenotyping | bcl6  | BCL-6  |        |     |



|                                                                    |                                  |                   |           |           |           |           |       |
|--------------------------------------------------------------------|----------------------------------|-------------------|-----------|-----------|-----------|-----------|-------|
| C83.1 DIFFUSE NON-HODGKIN'S LYMPHOMA, SMALL CLEAVED CELL (DIFFUSE) | CD5 positive                     | Immunophenotyping | cd5       | cd 5      | CD 5      |           |       |
| C83.1 DIFFUSE NON-HODGKIN'S LYMPHOMA, SMALL CLEAVED CELL (DIFFUSE) | CD10 negative                    | Immunophenotyping | cd10      | cd 10     | CD 10     |           |       |
| C83.1 DIFFUSE NON-HODGKIN'S LYMPHOMA, SMALL CLEAVED CELL (DIFFUSE) | CD23 negative or weakly positive | Immunophenotyping | cd23      | cd 23     | CD 23     |           |       |
| C83.1 DIFFUSE NON-HODGKIN'S LYMPHOMA, SMALL CLEAVED CELL (DIFFUSE) | CD43 positive                    | Immunophenotyping | cd43      | cd 43     | CD 43     |           |       |
| C83.1 DIFFUSE NON-HODGKIN'S LYMPHOMA, SMALL CLEAVED CELL (DIFFUSE) | Cyclin D1 expression             | Immunophenotyping | cyclin D1 | cyclin D1 | CYCLIN D1 | Cyclin D1 |       |
| C83.1 DIFFUSE NON-HODGKIN'S LYMPHOMA, SMALL CLEAVED CELL (DIFFUSE) | FMC7 positive                    | Immunophenotyping | fmc7      | FMC 7     | fmc 7     |           |       |
| C83.1 DIFFUSE NON-HODGKIN'S LYMPHOMA, SMALL CLEAVED CELL (DIFFUSE) | IgM/IgD expression               | Immunophenotyping | igm/igd   | IGM/IGD   | igm/Igd   |           |       |
| C83.1 DIFFUSE NON-HODGKIN'S LYMPHOMA, SMALL CLEAVED CELL (DIFFUSE) | IRF4 positive                    | Immunophenotyping | irf4      | IRF 4     | irf 4     |           |       |
| C83.1 DIFFUSE NON-HODGKIN'S LYMPHOMA, SMALL CLEAVED CELL (DIFFUSE) | MUM1 positive                    | Immunophenotyping | MUM-1     | MUM 1     | mum1      | mum-1     | mum 1 |

**Abbreviations.** CD, cluster of differentiation; Ig, immunoglobulins.

**Table S3. Set of NLP regular expressions embedded into the *header\_function.py*.**

|                   | REDCAP data label    | BIOPSY DATE                                                            | ID NUMBER                        | SURNAME                               | NAME                                  | DATE OF BIRTH                                      | PLACE OF BIRTH      | SEX          | SSN                                               | SPECIMEN TYPE                                                                                              |
|-------------------|----------------------|------------------------------------------------------------------------|----------------------------------|---------------------------------------|---------------------------------------|----------------------------------------------------|---------------------|--------------|---------------------------------------------------|------------------------------------------------------------------------------------------------------------|
|                   | REDCAP data variable | nod_date_exam_req                                                      | nod_exam_num_req                 | pts_surname_demo                      | pts_name_demo                         | dob_demo                                           | city_born_demo      | sex_demo     | ssn_demo                                          | ln_specimen_dis                                                                                            |
| REPORT TEMPLATE 1 | Internal             | "Accettazione" or "Pervenuto" or "Richiesta" del" or "Ricevimento"     | "N. Esame"                       | "Cognome"                             | "Nome"                                | "Data di nascita"                                  | "Comune di Nascita" | "Sesso"      | "Codice Fiscale"                                  | "Materiale Inviato"                                                                                        |
|                   | NLP pattern          | cettaz.+ ervenu to.+ ichiasta.*del.+ [0-3][0-9]/[0-1][0-9]/2[0-9][0-9] | .+same.*[0-3][0-9]-.\d+          | COGNOME.* COGNOME.*DATA COGNOME.*CITT | \\bNOME.* \\bNOME.*DATA \\bNOME.*CITT | .+asci.+[0-3][0-9]/[0-1][0-9]/[1-2][0-9][0-9][0-9] | .+omu.+asci.+w+     | .+ess.{1,3}m | [A-Z]{6}[0-9][0-9][A-Z][0-9]{2}[A-Z][0-9]{3}[A-Z] | ate.+al.+via.+\\n.+                                                                                        |
| REPORT TEMPLATE 2 | External             | "Accettazione" or "Pervenuto" or "Richiesta" del" or "Ricevimento"     | "Esame ISTOLOGICO N."            | NA                                    | NA                                    | NA                                                 | NA                  | NA           | NA                                                | "Materiale Inviato"                                                                                        |
|                   | NLP pattern          | cettaz.+ ervenu to.+ ichiasta.*del.+ [0-3][0-9]/[0-1][0-9]/2[0-9][0-9] | .+same.*[0-9][0-9][0-9][0-9]/.+. | NA                                    | NA                                    | NA                                                 | NA                  | NA           | NA                                                | ate.+al.+via.+\\n.+ ate.+al.+via.+\\n\\n.+ izie.+inich.+\\n.+ izie.+inich.+\\n.+ ate.+al.+via.+izie.+inich |
| REPORT TEMPLATE 3 | External             | "Accettazione" or "Pervenuto" or "Richiesta" del" or "Ricevimento"     | "ESAME ISTOLOGICO"               | NA                                    | NA                                    | NA                                                 | NA                  | NA           | NA                                                | "NOTIZIE CLINICHE"                                                                                         |
|                   | NLP pattern          | cettaz.+ ervenu to.+ ichiasta.*del.+ [0-3][0-9]/[0-1][0-9]/2[0-9][0-9] | SAM.*[0-9][0-9]/.+               | NA                                    | NA                                    | NA                                                 | NA                  | NA           | NA                                                | izie.+inich.+stologica                                                                                     |

|                      |             |                                                                                               |                              |    |    |    |    |    |    |                                                                            |
|----------------------|-------------|-----------------------------------------------------------------------------------------------|------------------------------|----|----|----|----|----|----|----------------------------------------------------------------------------|
| REPORT<br>TEMPLATE 4 | External    | "Accettazione"<br>or "Pervenuto"<br>or "Richiesta"<br>del" or<br>"Ricevimento"                | "Esame"                      | NA | NA | NA | NA | NA | NA | "Materiale<br>Inviato"                                                     |
|                      | NLP pattern | cettaz.+ ervenu<br>to.+ ichiasta.*d<br>el.+<br>[0-3][0-9]/[0-<br>1][0-9]/2[0-<br>9][0-9][0-9] | SAM.*[0-9][0-<br>9].+        | NA | NA | NA | NA | NA | NA | ate.+al.+via.+\\n<br>.+                                                    |
| REPORT<br>TEMPLATE 5 | External    | "Accettazione"<br>or "Pervenuto"<br>or "Richiesta"<br>del" or<br>"Ricevimento"                | "N. esame"                   | NA | NA | NA | NA | NA | NA | "MATERIALE<br>INVIATO"                                                     |
|                      | NLP pattern | cettaz.+ ervenu<br>to.+ ichiasta.*d<br>el.+<br>[0-3][0-9]/[0-<br>1][0-9]/2[0-<br>9][0-9][0-9] | .+same.*[0-<br>3][0-9]-.\\d+ | NA | NA | NA | NA | NA | NA | ate.+al.+via.+\\n<br>.+                                                    |
| REPORT<br>TEMPLATE 6 | External    | "Data"                                                                                        | "Esame"                      | NA | NA | NA | NA | NA | NA | "Sede/Material<br>e in esame"                                              |
|                      | NLP pattern | ata.+                                                                                         | SAM.*[0-9][0-<br>9].+        | NA | NA | NA | NA | NA | NA | ate.+al.+esa.+\\n<br>.+\\n.+                                               |
| REPORT<br>TEMPLATE 7 | External    | "Accettazione"<br>or "Pervenuto"<br>or "Richiesta"<br>del" or<br>"Ricevimento"                | "Esame"                      | NA | NA | NA | NA | NA | NA | "MATERIALE"<br>or first line<br>after<br>"DESCRIZIONE<br>MISCROSCOPIC<br>A |
|                      | NLP pattern | cettaz.+ ervenu<br>to.+ ichiasta.*d<br>el.+ riceviment<br>o.+                                 | SAM.*[0-9][0-<br>9].+        | NA | NA | NA | NA | NA | NA | aterial.+escrizio<br>ne                                                    |

**Abbreviations.** NLP, Natural Language Processing; ID, Identification; NA, Not Available, SSN, Social Security Number.

**Table S4. Set of NLP rules embedded into the *function\_read.py* for the whole patterns identified according to each scenario.**

| PATTERN | SENTENCE                                                                                                                                                                                                                                                                                                          | NLP PSEUDOCODE* | EXPECTED OUTPUT                                                                               |
|---------|-------------------------------------------------------------------------------------------------------------------------------------------------------------------------------------------------------------------------------------------------------------------------------------------------------------------|-----------------|-----------------------------------------------------------------------------------------------|
| 1.1     | [..] Marker1+, Marker2+ (weak expression), Marker3-, Marker4-/Marker5- [..]                                                                                                                                                                                                                                       | CASE A          | Marker1 positive, Marker2 positive, Marker3 negative, Marker4/marker5 negative                |
| 1.2     | [..] Marker1++, Marker2+/-, Marker3--, Marker4-/ + [..]                                                                                                                                                                                                                                                           | CASE A          | Marker1 positive, Marker2 positive, Marker3 negative, Marker4/marker5 negative                |
| 1.3     | [..] Marker1+, Marker2+ (weak expression), Marker3\t-, Marker4-/Marker5- [..]                                                                                                                                                                                                                                     | CASE A          | Marker1 positive, Marker2 positive, Marker3 negative, Marker4/marker5 negative                |
| 2.1     | [..] <b>pos</b> or <b>positive</b> or <b>reactive</b> or <b>immunoreactive</b> markers are Marker1, Marker2. <b>Neg</b> or <b>Negative</b> or <b>Immunonegative</b> markers are Marker3, Marker 4 [..]                                                                                                            | CASE B          | Marker1 positive, Marker2 positive, Marker3 negative, Marker4 negative                        |
| 2.2     | [..] Marker1 <b>pos</b> or <b>positive</b> or <b>reactive</b> or <b>immunoreactive</b> , Marker2 <b>pos</b> or <b>positive</b> or <b>reactive</b> (weak expression), Marker3 <b>neg</b> or <b>negative</b> or <b>immunonegative</b> , Marker4/Marker5 <b>neg</b> or <b>negative</b> or <b>immunonegative</b> [..] | CASE B          | Marker1 positive, Marker2 positive, Marker3 negative, Marker4 negative                        |
| 2.3     | [..] <b>positivity</b> or <b>immunoreactivity</b> or <b>reactivity</b> for Marker1, Marker2, <b>negativity</b> or <b>immunonegativity</b> for Marker3, Marker4 [..]                                                                                                                                               | CASE B          | Marker1 positive, Marker2 positive, Marker3 negative, Marker4 negative                        |
| 2.4     | [..] Marker1, Marker2, Marker3 <b>pos</b> or <b>positive</b> or <b>immunoreactive</b> or <b>reactive</b> , Marker4, Marker5 <b>neg</b> or <b>negative</b> or <b>immunonegative</b> [..]                                                                                                                           | CASE B          | Marker 1 positive, Marker 2 positive, Marker 3 positive, Marker 4 negative, Marker 5 negative |
| 2.5     | [..] Marker1, Marker2, Marker3 <b>positivity</b> or <b>immunoreactivity</b> or <b>reactivity</b> , Marker4, Marker5 <b>negativity</b> or <b>immunonegativity</b> [..]                                                                                                                                             | CASE B          | Marker 1 positive, Marker 2 positive, Marker 3 positive, Marker 4 negative, Marker 5 negative |
| 2.6     | [..] <b>positivity</b> or <b>immunoreactivity</b> or <b>reactivity</b> for Marker1, Marker2,\t <b>negativity</b> or <b>immunonegativity</b> for Marker3, Marker4 [..]                                                                                                                                             | CASE B          | Marker1 positive, Marker2 positive, Marker3 negative, Marker4 negative                        |
| 2.7     | [..] <b>positivity</b> or <b>immunoreactivity</b> or <b>reactivity</b> for Marker1,\t Marker2, <b>negativity</b> or <b>immunonegativity</b> for Marker3, Marker4 [..]                                                                                                                                             | CASE B          | Marker1 positive, Marker2 positive, Marker3 negative, Marker4 negative                        |
| 2.8     | [..] <b>pos</b> or <b>positive</b> or <b>reactive</b> or <b>immunoreactive</b> markers are Marker1, Marker2.\t <b>Neg</b> or <b>Negative</b> or <b>Immunonegative</b> markers are Marker3, Marker 4 [..]                                                                                                          | CASE B          | Marker1 positive, Marker2 positive, Marker3 negative, Marker4 negative                        |
| 2.9     | [..] <b>pos</b> or <b>positive</b> or <b>reactive</b> or <b>immunoreactive</b> markers are Marker1,\t Marker2. <b>Neg</b> or <b>Negative</b> or <b>Immunonegative</b> markers are Marker3, Marker 4 [..]                                                                                                          | CASE B          | Marker1 positive, Marker2 positive, Marker3 negative, Marker4 negative                        |
| 2.10    | [..] Marker1, Marker2, Marker3 <b>positivity</b> or <b>immunoreactivity</b> or <b>reactivity</b> ,\t Marker4, Marker5 <b>negativity</b> or <b>immunonegativity</b> [..]                                                                                                                                           | CASE B          | Marker 1 positive, Marker 2 positive, Marker 3 positive, Marker 4 negative, Marker 5 negative |
| 2.11    | [..] Marker1, Marker2,\t Marker3 <b>positivity</b> or <b>immunoreactivity</b> or <b>reactivity</b> , Marker4, Marker5 <b>negativity</b> or <b>immunonegativity</b> [..]                                                                                                                                           | CASE B          | Marker 1 positive, Marker 2 positive, Marker 3 positive, Marker 4 negative, Marker 5 negative |
| 2.12    | [..] Marker1 and Marker2 are <b>pos</b> or <b>positive</b> or <b>immunoreactive</b> or <b>reactive</b> and <b>neg</b> or <b>negative</b> or <b>immunonegative</b> respectively [..]                                                                                                                               | CASE B          | Marker 1 positive, Marker 2 positive                                                          |
| 2.13    | [..] Marker1 and Marker2 \t are <b>pos</b> or <b>positive</b> or <b>immunoreactive</b> or <b>reactive</b> and <b>neg</b> or <b>negative</b> or <b>immunonegative</b> respectively [..]                                                                                                                            | CASE B          | Marker 1 positive, Marker 2 positive                                                          |
| 2.14    | [..] Marker1 and Marker2 are <b>pos</b> or <b>positive</b> or <b>immunoreactive</b> or <b>reactive</b> and \t <b>neg</b> or <b>negative</b> or <b>immunonegative</b> respectively [..]                                                                                                                            | CASE B          | Marker 1 positive, Marker 2 positive                                                          |
| 3.1     | [..] <ul style="list-style-type: none"> <li>• Marker1+\t</li> <li>• Marker2+\t</li> <li>• Marker3-\t</li> </ul>                                                                                                                                                                                                   | CASE A          | Marker1 positive, Marker2 positive, Marker3 negative, Marker4 negative                        |

|     |                                                                                                                                                                                                                                                                                                                                                                                                              |        |                                                                        |
|-----|--------------------------------------------------------------------------------------------------------------------------------------------------------------------------------------------------------------------------------------------------------------------------------------------------------------------------------------------------------------------------------------------------------------|--------|------------------------------------------------------------------------|
|     | <ul style="list-style-type: none"> <li>Marker4-</li> </ul>                                                                                                                                                                                                                                                                                                                                                   |        |                                                                        |
| 3.2 | <p>[..]</p> <ul style="list-style-type: none"> <li>Marker1 <b>pos</b> or <b>positive</b> or <b>reactive</b> or <b>immunoreactive</b>\t</li> <li>Marker2 <b>pos</b> or <b>positive</b> or <b>reactive</b> or <b>immunoreactive</b>\t</li> <li>Marker3 <b>neg</b> or <b>negative</b> or <b>immunonegative</b>\t</li> <li>Marker4 <b>neg</b> or <b>negative</b> or <b>immunonegative</b></li> </ul> <p>[..]</p> | CASE C | Marker1 positive, Marker2 positive, Marker3 negative, Marker4 negative |
| 3.3 | <p>[..]</p> <p><b>Positive</b> or <b>Reactive</b> or <b>Immunoreactive</b> markers:\t</p> <ul style="list-style-type: none"> <li>Marker1, Marker2\t</li> </ul> <p>\t</p> <p><b>Negative</b> or <b>Immunonegative</b> markers:\t</p> <ul style="list-style-type: none"> <li>Marker3, Marker4</li> </ul> <p>[..]</p>                                                                                           | CASE B | Marker1 positive, Marker2 positive, Marker3 negative, Marker4 negative |
| 3.4 | <p>[..]</p> <p><b>Positive</b> or <b>Reactive</b> or <b>Immunoreactive</b> markers:\t</p> <ul style="list-style-type: none"> <li>Marker1\t</li> <li>Marker2\t</li> </ul> <p>\t</p> <p><b>Negative</b> or <b>Immunonegative</b> markers:\t</p> <ul style="list-style-type: none"> <li>Marker3\t</li> <li>Marker4</li> </ul> <p>[..]</p>                                                                       | CASE B | Marker1 positive, Marker2 positive, Marker3 negative, Marker4 negative |
| 3.5 | <p>[..]</p> <p><b>Positivity</b> or <b>Reactivity</b> or <b>Immunoreactivity</b>:\t</p> <ul style="list-style-type: none"> <li>Marker1, Marker2\t</li> </ul> <p>\t</p> <p><b>Negativity</b> or <b>Immunonegativity</b>:\t</p> <ul style="list-style-type: none"> <li>Marker3, Marker4</li> </ul> <p>[..]</p>                                                                                                 | CASE B | Marker1 positive, Marker2 positive, Marker3 negative, Marker4 negative |
| 3.6 | <p>[..]</p> <p><b>Positivity</b> or <b>Reactivity</b> or <b>Immunoreactivity</b>:\t</p> <p>Marker1\t</p> <p>Marker2\t</p> <p>\t</p> <p><b>Negativity</b> or <b>Immunonegativity</b>:\t</p> <p>Marker3\t</p> <p>Marker4</p> <p>[..]</p>                                                                                                                                                                       | CASE B | Marker1 positive, Marker2 positive, Marker3 negative, Marker4 negative |
| 4.1 | [..] Marker6 <b>equal</b> to 60% [..]                                                                                                                                                                                                                                                                                                                                                                        | CASE D | Marker6 = 60%                                                          |
| 4.2 | [..] Marker6 <b>similar</b> to 60% [..]                                                                                                                                                                                                                                                                                                                                                                      | CASE D | Marker6 = 60%                                                          |

|     |                                                     |        |               |
|-----|-----------------------------------------------------|--------|---------------|
| 4.3 | [..] Marker6 = or > or < 60% [..]                   | CASE D | Marker6 = 60% |
| 4.4 | [..] Marker6 (60%) [..]                             | CASE D | Marker6 = 60% |
| 4.5 | [..] Marker6 <b>between</b> 30% and 60% [..]        | CASE D | Marker6 = 60% |
| 4.6 | [..] Marker6 with <b>sixty</b> % of expression [..] | CASE D | Marker6 = NA  |
| 4.7 | [..] <b>low</b> expression of Marker6 [..]          | CASE D | Marker6 = NA  |

**Abbreviations.** NLP, Natural Language Processing.

Where, CASE A is:

```

SET positiveFound to FALSE
SET textVerse to NULL
SET positivePosition to NULL
FOR each qualifier in positiveQualifiers
  DETERMINE the line that contains it
  SET positiveLine to the line found
  SET temporaryPosition equal to the position of the qualifier in the text
  IF a marker is in positiveLine THEN
    SET positiveFound to TRUE
    SET positivePosition to temporaryPosition
    SET markerPosition equal to the position of the marker in the text
    IF markerPosition is greater than positivePosition THEN
      SET textVerse to left
    ELSE
      SET textVerse to right
    ENDIF
  EXIT FOR loop
ENDIF
ENDFOR
SET negativeFound to FALSE
SET negativePosition to NULL
FOR each qualifier in negativeQualifiers
  DETERMINE the line that contains it
  SET negativeLine to the line found
  SET temporaryPosition equal to the position of the qualifier in the text
  IF a marker is in negativeLine THEN
    SET markerPosition equal to the position of the marker in the text
    SET negativeFound to TRUE
    SET negativePosition to temporaryPosition
    IF markerPosition is greater than negativePosition AND textVerse is NULL THEN
      SET textVerse to left
    ELSE
      SET textVerse to right
    ENDIF
  EXIT FOR loop
ENDIF
ENDFOR
SET i equal to 0
FOR each marker in the text
  SET markerPosition equal to the position of the marker in the text
  CASE BASED on positiveFound AND negativeFound
    CASE positiveFound is TRUE AND negativeFound is TRUE
      SET deltaPositive equal to positivePosition minus markerPosition
      SET deltaNegative equal to negativePosition minus markerPosition
      IF textVerse is right THEN
        IF deltaPositive is lesser than deltaNegative AND deltaPositive is greater than 0 THEN
          SET markerQuality[i] equal to marker trailed with "+"
        ELSE IF deltaNegative is lesser than deltaPositive AND deltaNegative is greater than 0 THEN
          SET markerQuality[i] equal to marker trailed with "-"
        ENDIF
      ELSE
        IF deltaPositive is lesser than deltaNegative AND deltaNegative is greater than 0 THEN
          SET markerQuality[i] equal to marker trailed with "+"
        ELSE IF deltaNegative is lesser than deltaPositive AND deltaPositive is greater than 0 THEN
          SET markerQuality[i] equal to marker trailed with "-"
        ELSE IF deltaPositive is lesser than deltaNegative AND deltaNegative is lesser than 0 THEN
          SET markerQuality[i] equal to marker trailed with "-"
        ELSE IF deltaNegative is lesser than deltaPositive AND deltaPositive is lesser than 0 THEN
          SET markerQuality[i] equal to marker trailed with "+"
        ENDIF
      ENDIF
    CASE positiveFound is TRUE AND negativeFound is FALSE
      SET markerQuality[i] equal to marker trailed with "+"
    CASE positiveFound is FALSE AND negativeFound is TRUE
      SET markerQuality[i] equal to marker trailed with "-"
  ENDCASE
  SET i equal to i plus 1
ENDFOR

```

CASE B is:

```
SET i equal to 0
FOR each marker in the text
  SET tempMarkerQualityPlus equal to marker trailed with "+"
  SET tempMarkerQualityDash equal to marker trailed with "-"
  IF tempMarkerQualityPlus is in the text THEN
    SET markerQuality[i] equal to tempMarkerQualityPlus
  ELSE IF tempMarkerQualityDash is in the text THEN
    SET markerQuality[i] equal to tempMarkerQualityDash
  ENDIF
  SET i equal to i plus 1
ENDFOR
```

CASE C is:

```
SET i equal to 0
FOR each marker in the text
  SET markerFound equal to FALSE
  FOR each qualifier in positiveQualifiers
    SET tempMarkerQualityPlus equal to marker trailed with qualifier
    IF tempMarkerQualityPlus is in the text THEN
      SET markerQuality[i] equal to tempMarkerQualityPlus
      SET markerFound equal to TRUE
    ENDIF
  ENDFOR
  IF markerFound is FALSE THEN
    FOR each qualifier in negativeQualifiers
      SET tempMarkerQualityDash equal to marker trailed with qualifier
      IF tempMarkerQualityDash is in the text THEN
        SET markerQuality[i] equal to tempMarkerQualityDash
      ENDIF
    ENDFOR
  ENDIF
  SET i equal to i plus 1
ENDFOR
```

CASE D is:

```
SET i equal to 0
FOR each percentageValue in the text
  SET percValue[i] equal to percentageValue
  SET deltaPerc equal to 10^9
  SET percPosition equal to the percentageValue position in the text
  FOR each marker in text
    SET markerPosition equal to the position of the marker in the text
    SET deltaPos equal to percPosition minus markerPosition
    IF deltaPos is lesser than deltaPerc THEN
      SET markerPerc[i] equal to marker
    ENDIF
  ENDFOR
ENDFOR
```



**Table S5. Data dictionary extracted from REDCap for data fields used to map each word detected from the NLP.**

| VARIABLE/FIELD NAME | DETECTABLE FROM THE NLP WEB APPLICATION? | REDCAP INSTRUMENT  | FIELD TYPE | FIELD LABEL                                           | CHOICES, CALCULATIONS, OR SLIDER LABELS | TEXT VALIDATION TYPE OR SHOW SLIDER NUMBER |
|---------------------|------------------------------------------|--------------------|------------|-------------------------------------------------------|-----------------------------------------|--------------------------------------------|
| hist_executed_req   | Y                                        | disease_parameters | yesno      | Histopathological examination executed?               |                                         |                                            |
| diagnosis_dis       | Y                                        | disease_parameters | text       | Diagnosis (semi-automatic)                            |                                         |                                            |
| ln_specimen_dis     | Y                                        | disease_parameters | yesno      | Did the specimen type a lymph-node?                   |                                         |                                            |
| internal_ihc_req    | Y                                        | disease_parameters | yesno      | Was the exam performed internally to the institution? |                                         |                                            |
| external_exam_req   | Y                                        | disease_parameters | text       | If external, please specify the centre name           |                                         |                                            |
| nod_exam_num_req    | Y                                        | disease_parameters | text       | Number of the exam                                    |                                         |                                            |
| nod_date_exam_req   | Y                                        | disease_parameters | text       | Date of the exam                                      |                                         | date_dmy                                   |
| protein_ihc_dis     | Y                                        | disease_parameters | yesno      | Was the immunohistochemistry performed?               |                                         |                                            |
| blastoid_dis        | Y                                        | disease_parameters | yesno      | Has a blastoid histology been detected?               |                                         |                                            |
| bcl2_ln_exp_dis     | Y                                        | disease_parameters | radio      | BCL2 detected?                                        | 1, Yes   0, No                          |                                            |
| myc_ln_exp_dis      | Y                                        | disease_parameters | radio      | MYC detected?                                         | 1, Yes   0, No                          |                                            |
| bcl6_ln_exp_dis     | Y                                        | disease_parameters | radio      | BCL6 detected?                                        | 1, Yes   0, No                          |                                            |
| cd5_ln_exp_dis      | Y                                        | disease_parameters | radio      | CD5 detected?                                         | 1, Yes   0, No                          |                                            |
| cd10_ln_exp_dis     | Y                                        | disease_parameters | radio      | CD10 detected?                                        | 1, Yes   0, No                          |                                            |
| cd15_ln_exp_dis     | Y                                        | disease_parameters | radio      | CD15 detected?                                        | 1, Yes   0, No                          |                                            |
| cd19_ln_exp_dis     | Y                                        | disease_parameters | radio      | CD19 detected?                                        | 1, Yes   0, No                          |                                            |
| cd20_ln_exp_dis     | Y                                        | disease_parameters | radio      | CD20 detected?                                        | 1, Yes   0, No                          |                                            |
| cd22_ln_exp_dis     | Y                                        | disease_parameters | radio      | CD22 detected?                                        | 1, Yes   0, No                          |                                            |
| cd23_ln_exp_dis     | Y                                        | disease_parameters | radio      | CD23 detected?                                        | 1, Yes   0, No                          |                                            |
| cd30_ln_exp_dis     | Y                                        | disease_parameters | radio      | CD30 detected?                                        | 1, Yes   0, No                          |                                            |
| cd43_ln_exp_dis     | Y                                        | disease_parameters | radio      | CD43 detected?                                        | 1, Yes   0, No                          |                                            |
| cd79a_ln_exp_dis    | Y                                        | disease_parameters | radio      | CD79a detected?                                       | 1, Yes   0, No                          |                                            |

|                     |   |                    |       |                                                            |                     |          |
|---------------------|---|--------------------|-------|------------------------------------------------------------|---------------------|----------|
| cget_ln_exp_dis     | Y | disease_parameters | radio | GCET detected?                                             | 1, Yes   0, No      |          |
| gcet2_ln_exp_dis    | Y | disease_parameters | radio | GCET2 (HGAL) detected?                                     | 1, Yes   0, No      |          |
| foxp1_ln_exp_dis    | Y | disease_parameters | radio | FOXP1 detected?                                            | 1, Yes   0, No      |          |
| irf4_ln_exp_dis     | Y | disease_parameters | radio | IRF4/MUM1 detected?                                        | 1, Yes   0, No      |          |
| lmo_ln_exp_dis      | Y | disease_parameters | radio | LMO2 detected?                                             | 1, Yes   0, No      |          |
| igd_ln_exp_dis      | Y | disease_parameters | radio | IGD detected                                               | 1, Yes   0, No      |          |
| igm_ln_exp_dis      | Y | disease_parameters | radio | IGM detected                                               | 1, Yes   0, No      |          |
| pax5_ln_exp_dis     | Y | disease_parameters | radio | PAX5 detected?                                             | 1, Yes   0, No      |          |
| fmc7_ln_exp_dis     | Y | disease_parameters | radio | FMC7 detected?                                             | 1, Yes   0, No      |          |
| cd1_ln_exp_dis      | Y | disease_parameters | radio | Cyclin D1                                                  | 1, Yes   0, No      |          |
| bcl2_positive_dis   | Y | disease_parameters | text  | BCL2 positive cells                                        |                     | integer  |
| myc_positive_dis    | Y | disease_parameters | text  | MYC positive cells                                         |                     | integer  |
| mum1_positive_dis   | Y | disease_parameters | text  | MUM1 positive cells                                        |                     | integer  |
| ki67_positive_dis   | Y | disease_parameters | text  | Ki-67 positive cells                                       |                     | integer  |
| coo_exe_hans_dis    | Y | disease_parameters | yesno | Was the Subtype Classification executed according to Hans? |                     |          |
| coo_hans_dis        | Y | disease_parameters | radio | Subtype classification according to Hans                   | 1, GCB   2, Not GCB |          |
| fish_exe_dis        | Y | disease_parameters | yesno | Was the FISH executed?                                     |                     |          |
| internal_fish_req   | Y | disease_parameters | yesno | Was the exam performed internally to the institution?      |                     |          |
| external_fish_req   | Y | disease_parameters | text  | If external, please specify the centre name                |                     |          |
| fish_date_exam_req  | Y | disease_parameters | text  | Date of the analysis                                       |                     | date_dmy |
| fish_exam_num_req   | Y | disease_parameters | text  | Number of the exam                                         |                     |          |
| myc_rear_dis        | Y | disease_parameters | radio | MYC rearrangement detected?                                | 1, Yes   0, No      |          |
| bcl2_rear_dis       | Y | disease_parameters | radio | BCL2 rearrangement detected?                               | 1, Yes   0, No      |          |
| bcl6_rear_dis       | Y | disease_parameters | radio | BCL6 rearrangement detected?                               | 1, Yes   0, No      |          |
| bm_dis              | Y | disease_parameters | yesno | Is present a medullary disease?                            |                     |          |
| bm_specimen_dis     | Y | disease_parameters | yesno | Was the bone marrow analysed by IHC?                       |                     |          |
| internal_ihc_bm_req | Y | disease_parameters | yesno | Was the exam performed internally to the institution?      |                     |          |

|                      |   |                    |       |                                             |                |          |
|----------------------|---|--------------------|-------|---------------------------------------------|----------------|----------|
| external_exam_bm_req | Y | disease_parameters | text  | If external, please specify the centre name |                |          |
| bm_exam_num_req      | Y | disease_parameters | text  | Number of the exam                          |                |          |
| bm_date_exam_req     | Y | disease_parameters | text  | Date of the analysis                        |                | date_dmy |
| cd5_bm_exp_dis       | Y | disease_parameters | radio | CD5 detected?                               | 1, Yes   0, No |          |
| cd10_bm_exp_dis      | Y | disease_parameters | radio | CD10 detected?                              | 1, Yes   0, No |          |
| cd15_bm_exp_dis      | Y | disease_parameters | radio | CD15 detected?                              | 1, Yes   0, No |          |
| cd19_bm_exp_dis      | Y | disease_parameters | radio | CD19 detected?                              | 1, Yes   0, No |          |
| cd20_bm_exp_dis      | Y | disease_parameters | radio | CD20 detected?                              | 1, Yes   0, No |          |
| cd22_bm_exp_dis      | Y | disease_parameters | radio | CD22 detected?                              | 1, Yes   0, No |          |
| cd23_bm_exp_dis      | Y | disease_parameters | radio | CD23 detected?                              | 1, Yes   0, No |          |
| cd30_bm_exp_dis      | Y | disease_parameters | radio | CD30 detected?                              | 1, Yes   0, No |          |
| cd43_bm_exp_dis      | Y | disease_parameters | radio | CD43 detected?                              | 1, Yes   0, No |          |
| cd79a_bm_exp_dis     | Y | disease_parameters | radio | CD79a detected?                             | 1, Yes   0, No |          |
| myc_bm_exp           | Y | disease_parameters | radio | MYC detected?                               | 1, Yes   0, No |          |
| gcet_bm_exp_dis      | Y | disease_parameters | radio | GCET detected?                              | 1, Yes   0, No |          |
| gcet2_bm_exp_dis     | Y | disease_parameters | radio | GCET2 (HGAL detected ?)                     | 1, Yes   0, No |          |
| foxp1_bm_exp_dis     | Y | disease_parameters | radio | FOXP1 detected?                             | 1, Yes   0, No |          |
| irf4_bm_exp_dis      | Y | disease_parameters | radio | IRF4/MUM1 detected?                         | 1, Yes   0, No |          |
| lmo_bm_exp_dis       | Y | disease_parameters | radio | LMO2 detected?                              | 1, Yes   0, No |          |
| igd_bm_exp_dis       | Y | disease_parameters | radio | IGD detected?                               | 1, Yes   0, No |          |
| igm_bm_exp_dis       | Y | disease_parameters | radio | IGM detected?                               | 1, Yes   0, No |          |
| pax5_bm_exp_dis      | Y | disease_parameters | radio | PAX5 detected?                              | 1, Yes   0, No |          |
| fmc7_bm_exp_dis      | Y | disease_parameters | radio | FMC7 detected?                              | 1, Yes   0, No |          |
| cd1_bm_exp_dis       | Y | disease_parameters | radio | Cyclin D1 detected?                         | 1, Yes   0, No |          |

**Abbreviations.** NLP, natural language process; Y, Yes; radio, radio button; CD, cluster of differentiation; IHC, immunohistochemical; FISH, fluorescent *in situ* hybridization.

## Source code S1. Source code developed in Python for the application of the thesaurus rules.

```
#Thesaurus for the biomarkers
difficult_pattern = "IG.|BC.[0-9]|..67|CICLINAD.|MUM|LCA|CKAE1/AE3|CD31|P\d+\+|CD\d+|BC.E"
Used after the normalization: text = text.replace(' ','')
    text = text.replace('\n','')
    text = text.replace('-', '')

#Thesaurus for the specimens
pattern_nodal = "tumef|infono|odul|infonod|linfadenopatia|laterocervical[e|i]|mediastinic[a|o]|linfondoascellar[e|i]|ascella|linfodolinguinale|...
alinfonodoinguinale|mediastinic."
    pattern_extra_nodal = "esticol|rene|tonsill|bronchiali|bronchi|polmonare|polmon.|tiroid|mammella|mammar|stomac|fegato|duoden|ileo|colon|...
lingua|pancrea|urinario|splenic|milza|renale|ileale|digiuno|gastric|parotide|ghiandol.|salivar.|rinofaringe|vescical.|vescica|cutaneo|cutanea|cerebellar.|...
epatic|celebral.|antro|retroperitoneal.|epatic.|gastric|extradurale|retto|rettale|linfadenopati.|digiuno|ileale|palat|trachea"
    pattern_PB = "periferico|sangue"
    pattern_BOM="bom|steomidollar|idollar|spirat|gnab|trucut|osse.|cauda|sternale"
Questi per gli specimen

#Thesaurus for the disease nomenclature
| C82.9 Follicular non-Hodgkin's lymphoma, unspecified | C82.9 LINFOMA FOLLICOLAR NON HODGKIN |
| C83.3 Diffuse non-Hodgkins lymphoma, large cell (diffuse) | C83.3 LINFOMA DIFFUSO NON HODGKIN, A GRANDI CELLULE (DIFFUSO) |
| C83.1 Diffuse non-Hodgkin's lymphoma, Small cleaved cell (diffuse) | C83.1 LINFOMA NON HODGKIN MANTELL |
```

## References

1. Ruhl J, Adamo MP, Dickie L, Negoita S. Hematopoietic and Lymphoid Neoplasm Coding Manual, Bethesda, MD, US: 2020.
2. World Health Organization. Classification of diseases (ICD). [<https://www.who.int/classifications/classification-of-diseases>].
